# Supplementary material
Source: PubMed Central journal article supplement (PMC7284146)
Supplement: TBSD_A_1768149_SM4593.pdf [file TBSD_A_1768149_SM4593.pdf]

## **Supporting Information**

### **Elucidating biophysical basis of binding of inhibitors to SARS-CoV-2 main protease by using molecular dynamics simulations and free energy calculations**

Md Fulbabu Sk, Rajarshi Roy, Nisha Amarnath Jonniya, Sayan Poddar, Parimal Kar\*

Discipline of Biosciences and Biomedical Engineering, Indian Institute of Technology  
Indore, Khandwa Road, MP 453552, India.

\*Corresponding Author: Parimal Kar | Email: [parimal@iiti.ac.in](mailto:parimal@iiti.ac.in) | Phone: +91 731 2438700  
(Ext. 550)

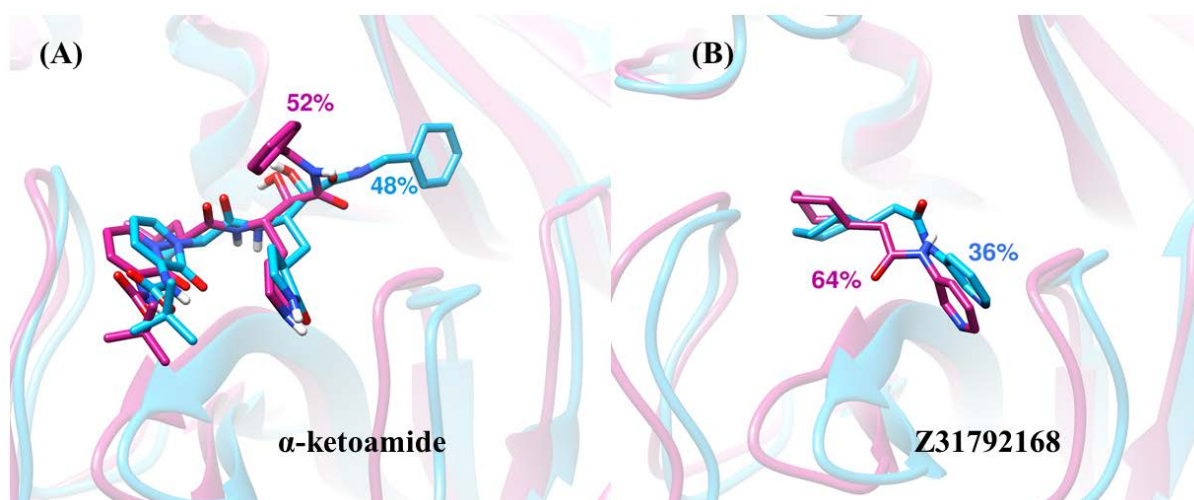

**Figure S1:** Orientation of the dominant conformation of inhibitors (A)  $\alpha$ -ketoamide and (B) Z31792168 obtained from the K-means clustering analysis.

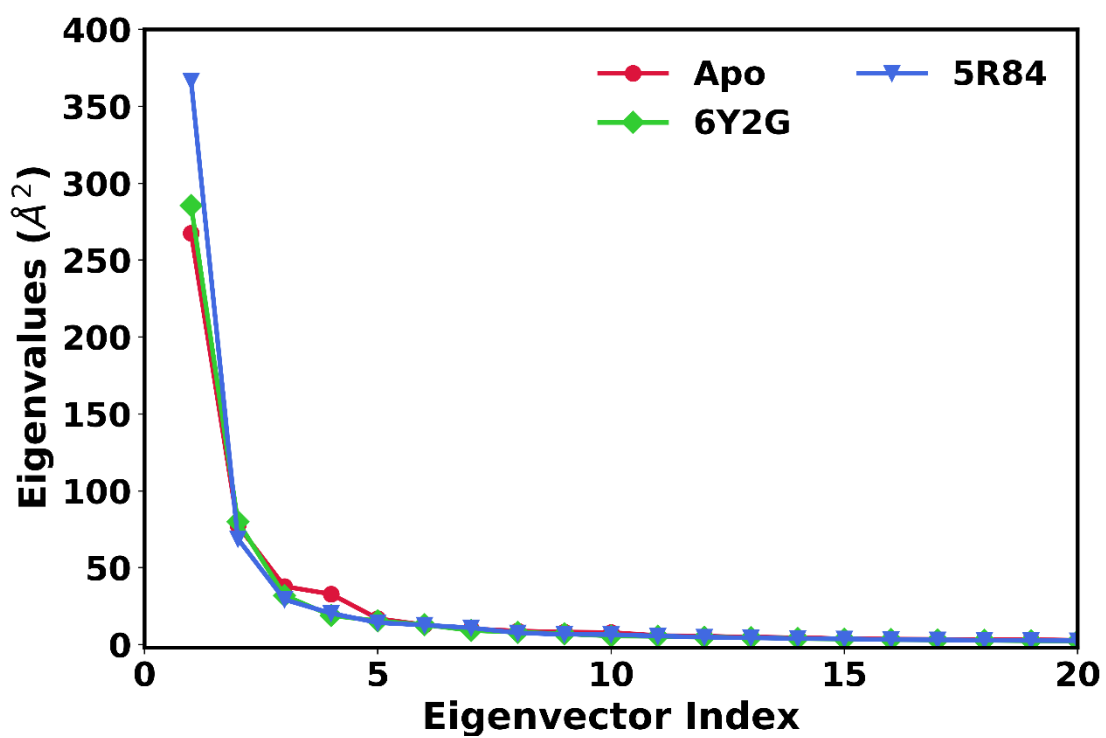

**Figure S2:** Comparison of the eigenvalues plotted against the corresponding eigenvector indices for apo (red), 3CL<sup>pro</sup>/ $\alpha$ -ketoamide (green), and 3CL<sup>pro</sup>/Z31792168 (blue).

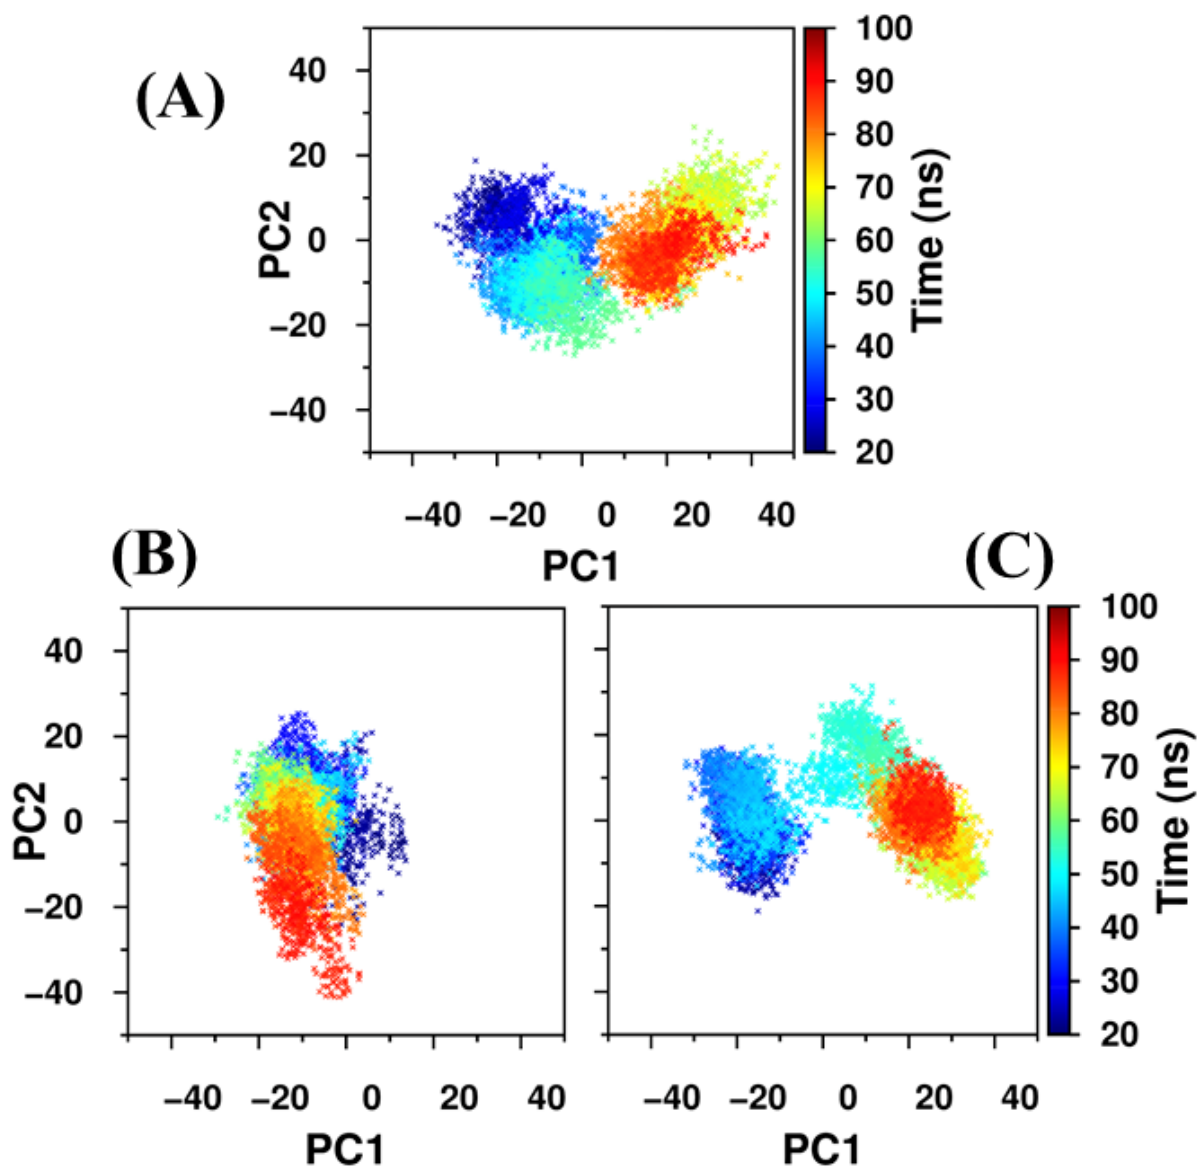

**Figure S3:** The maps of PC1 and PC2 during MD simulation of (A) apo, (B) 3CL<sup>pro</sup>/α-ketoamide, and (C) 3CL<sup>pro</sup>/Z31792168. Colour codes represent the simulation time.

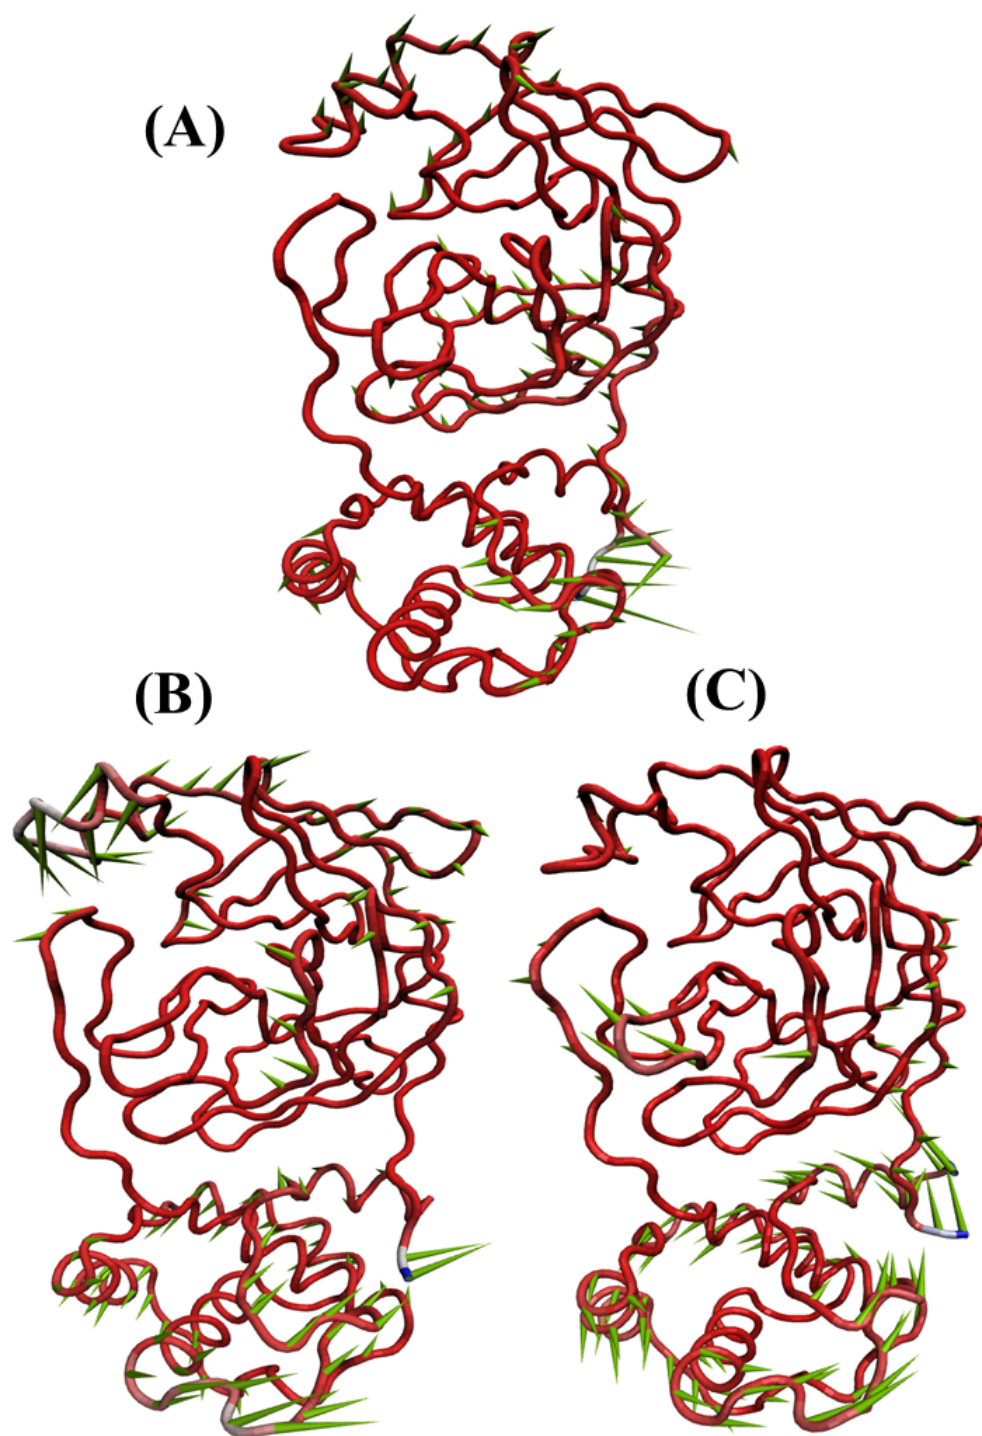

**Figure S4:** Porcupine plots showing prominent motions for (A) apo, (B) 3CL<sup>pro</sup>/α-ketoamide and (C) 3CL<sup>pro</sup>/Z31792168. Green represent eigenvector showing the direction of prominent movements. Length of the eigenvectors represents the magnitude of the movements.

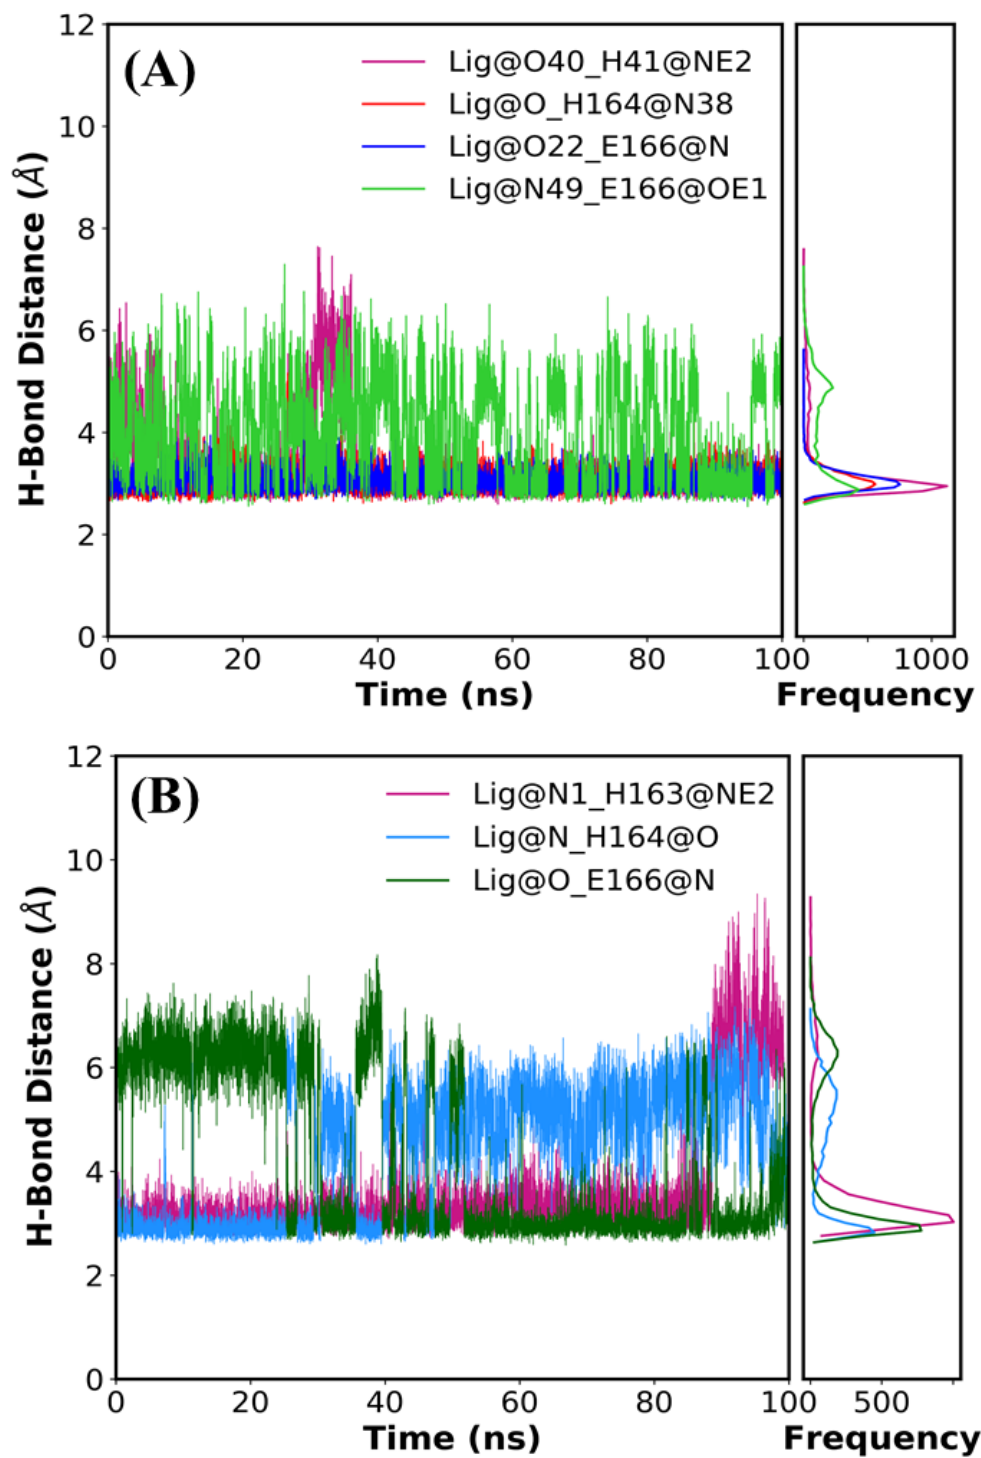

**Figure S5:** Time evolution of hydrogen bond distances and the probability distribution of (A) 3CL<sup>pro</sup>/ $\alpha$ -ketoamide and (B) 3CL<sup>pro</sup>/Z31792168 complexes.

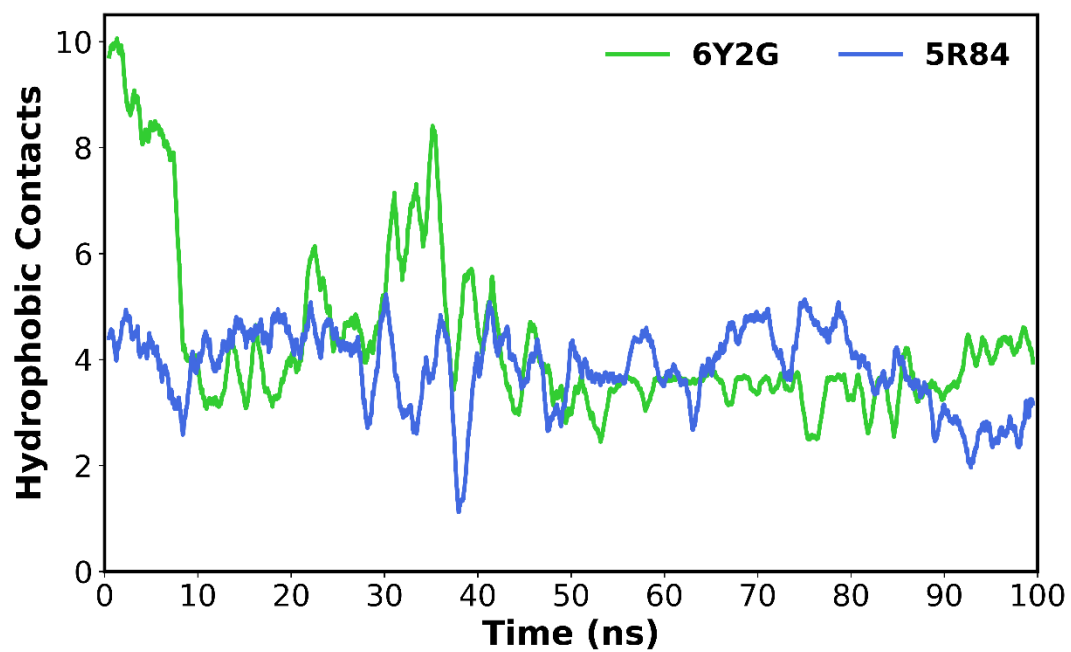

**Figure S6:** The time evolution of hydrophobic contacts for 3CL<sup>pro</sup>/ $\alpha$ -ketoamide (green) and 3CL<sup>pro</sup>/Z31792168 (blue).
